# Supplementary material for: Design of photoinitiator-functionalized hydrophilic nanogels with uniform size and excellent biocompatibility
Source: Royal Society of Chemistry journal article supplement (doi:10.1039/c9py00054b), 2019-01-01
Supplement: c9py00054b1.pdf [file c9py00054b1.pdf]

## Supporting Information

### **Design of photoinitiator-functionalized hydrophilic nanogels with uniform size and excellent biocompatibility**

Meng Wei,<sup>ab</sup> Yanjing Gao,<sup>b</sup> Shengling Jiang,<sup>c</sup> Jun Nie<sup>ab</sup> and Fang Sun<sup>\*ab</sup>

<sup>a</sup> State Key Laboratory of Chemical Resource Engineering, Beijing University of Chemical Technology, Beijing 100029, People's Republic of China

<sup>b</sup> College of Science, Beijing University of Chemical Technology, Beijing 100029, People's Republic of China

<sup>c</sup> College of Materials Science and Engineering, Beijing University of Chemical Technology, Beijing 100029, People's Republic of China

\*Corresponding Author: E-mail:sunfang60@yeah.net, Phone:+86-10-64449336, Fax: +86-10-64437802

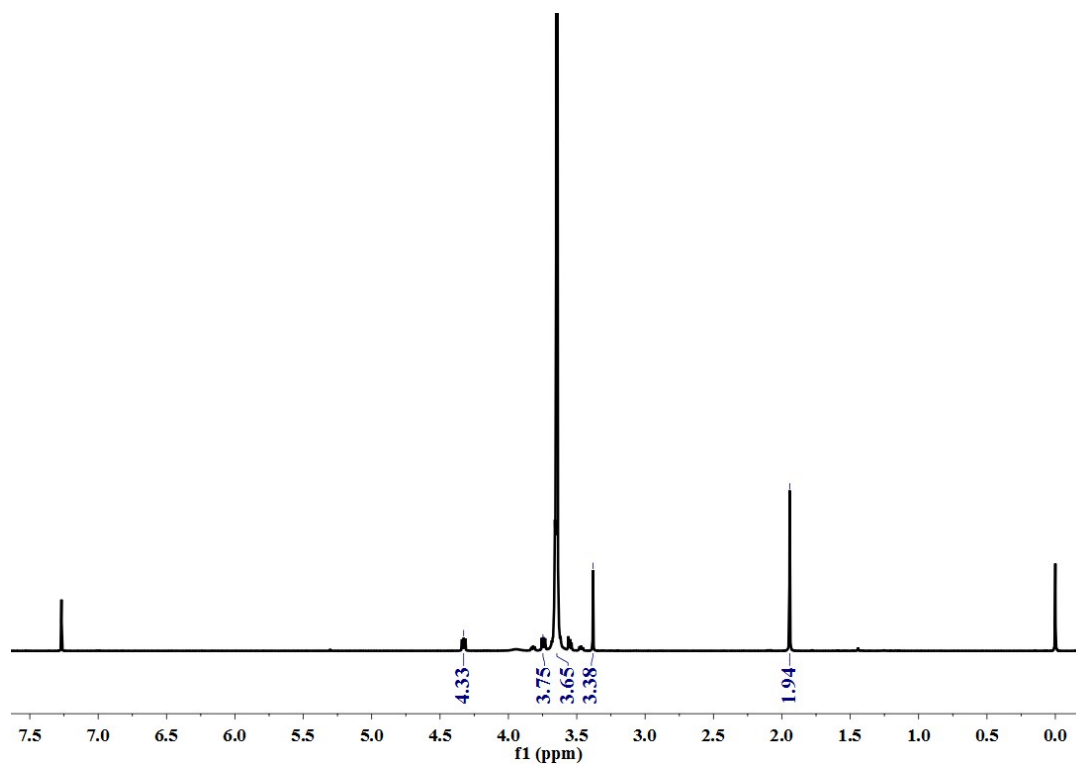

Figure S1.  $^1\text{H}$  NMR spectrum of PEO5000-Br

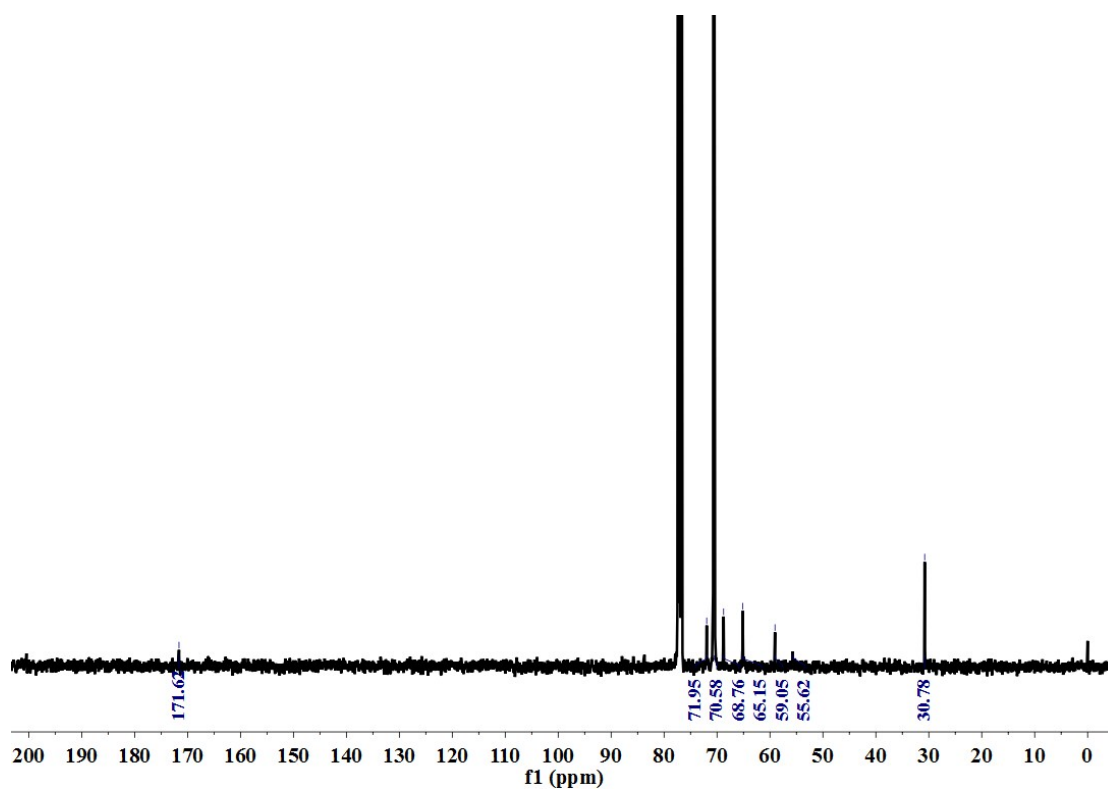

Figure S2  $^{13}\text{C}$  NMR spectrum of PEO5000-Br

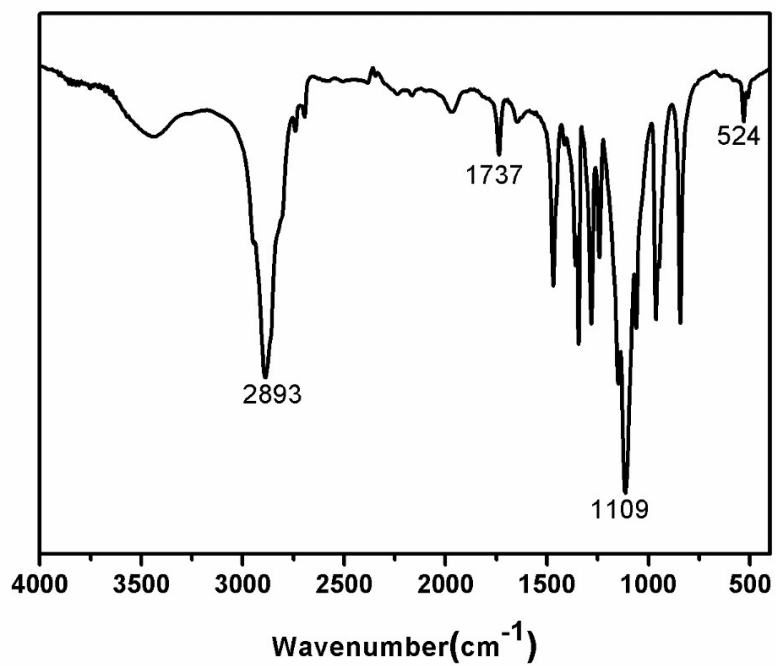

Figure S3. FTIR spectrum of PEO5000-Br

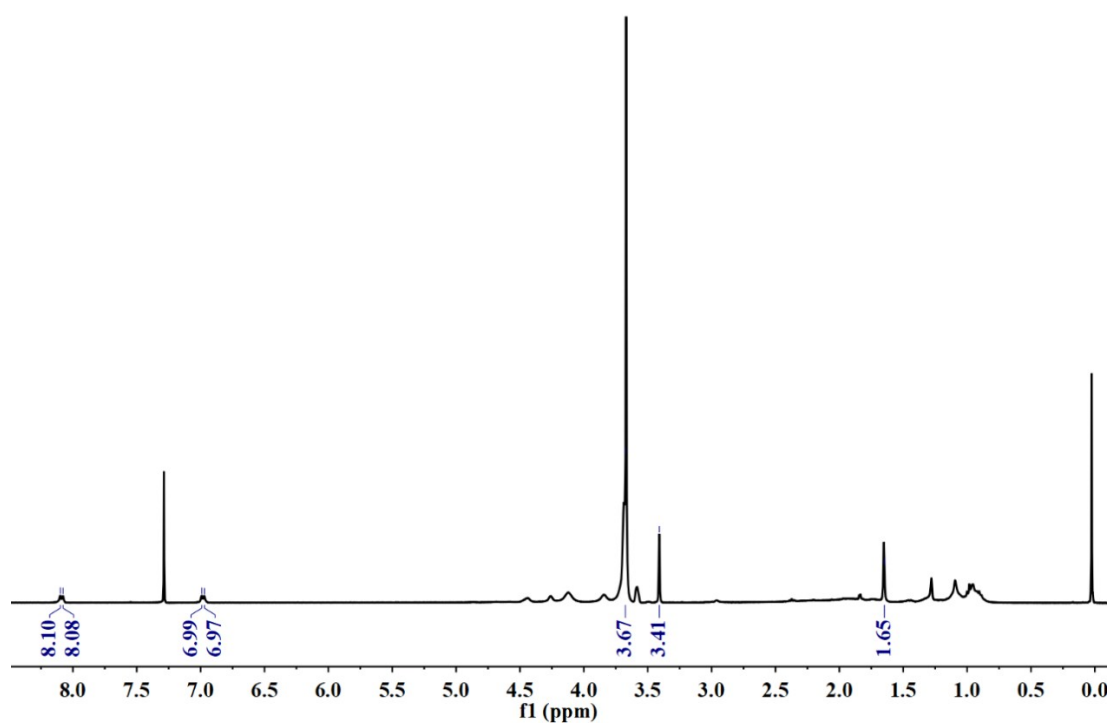

Figure S4. <sup>1</sup>H NMR spectrum of NG-300-2959

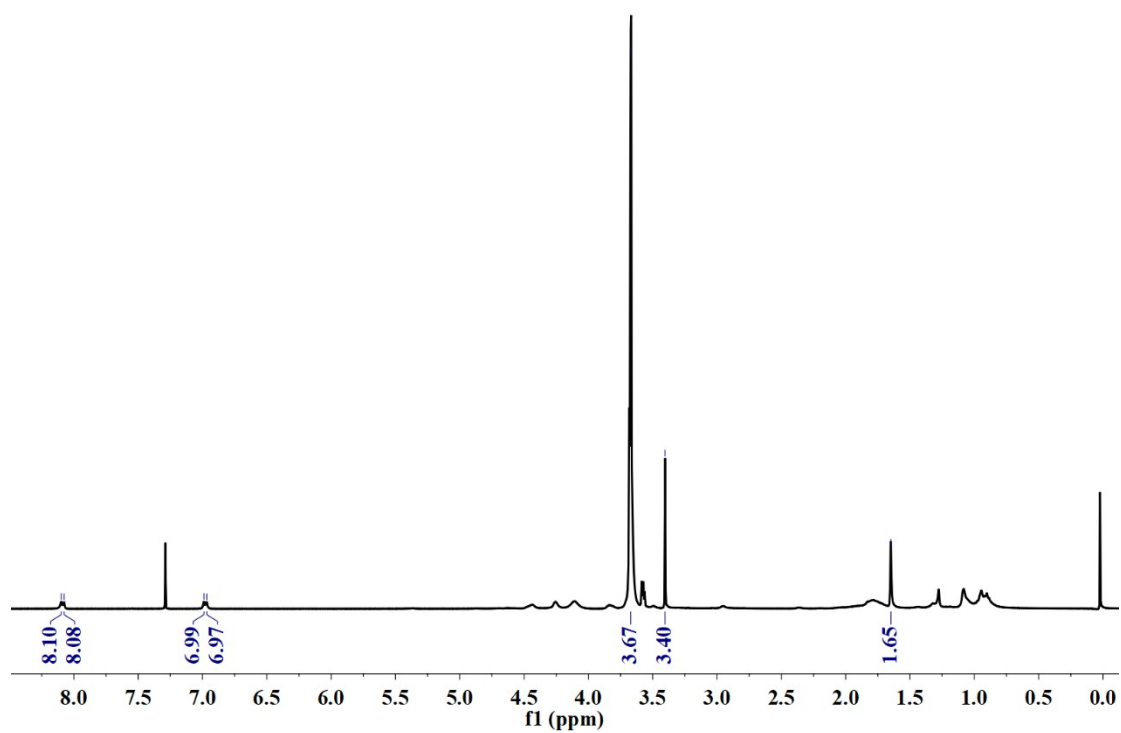

**Figure S5.**  $^1\text{H}$  NMR spectrum of NG-500-2959

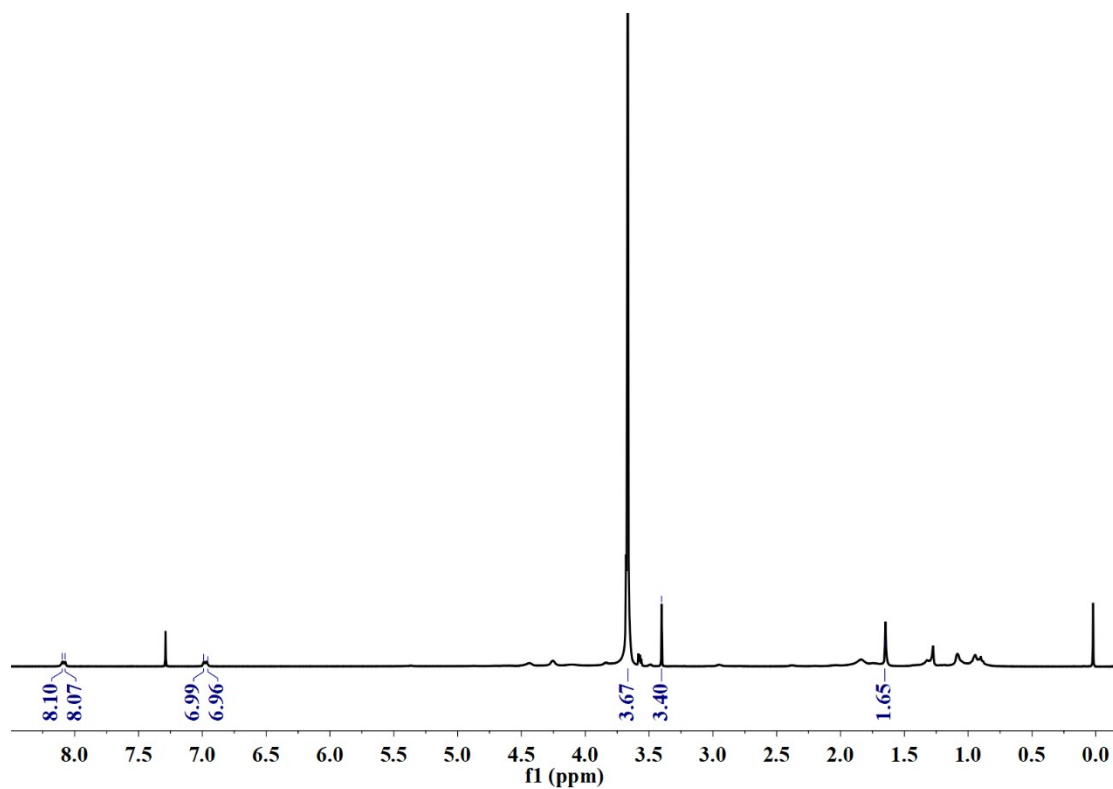

**Figure S6.**  $^1\text{H}$  NMR spectrum of NG-950-2959

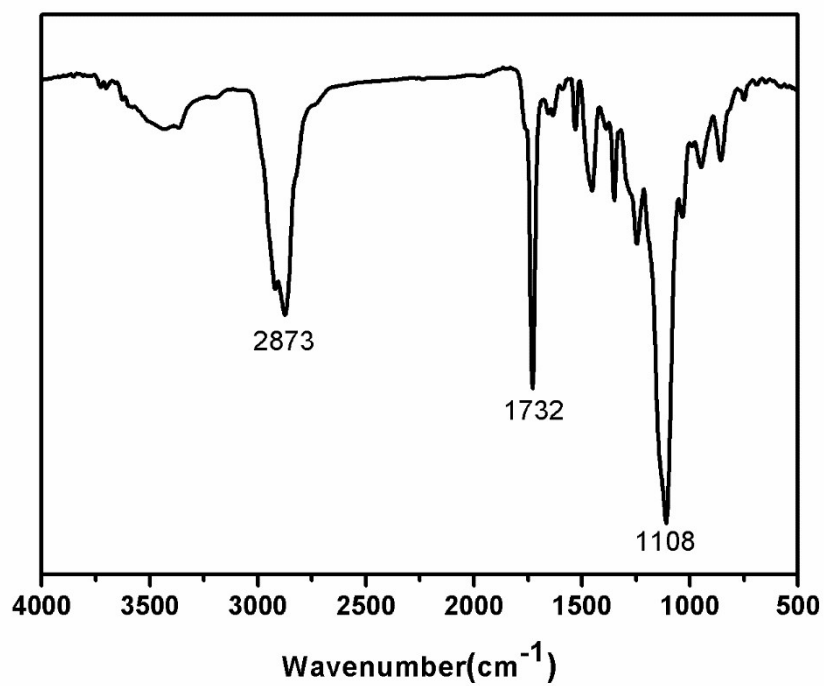

**Figure S7.** FTIR spectrum of NG-300-2959

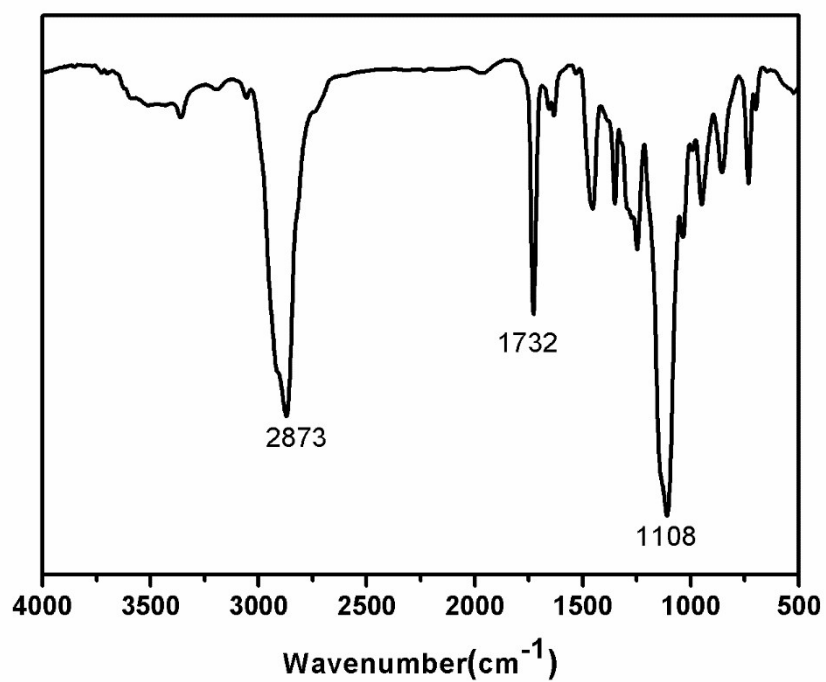

**Figure S8.** FTIR spectrum of NG-500-2959

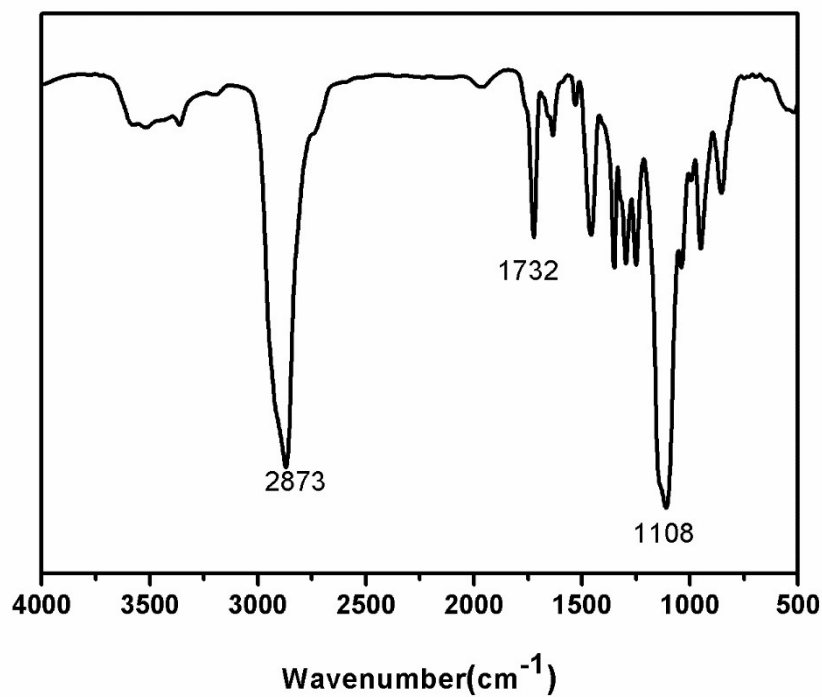

**Figure S9.** FTIR spectrum of NG-950-2959

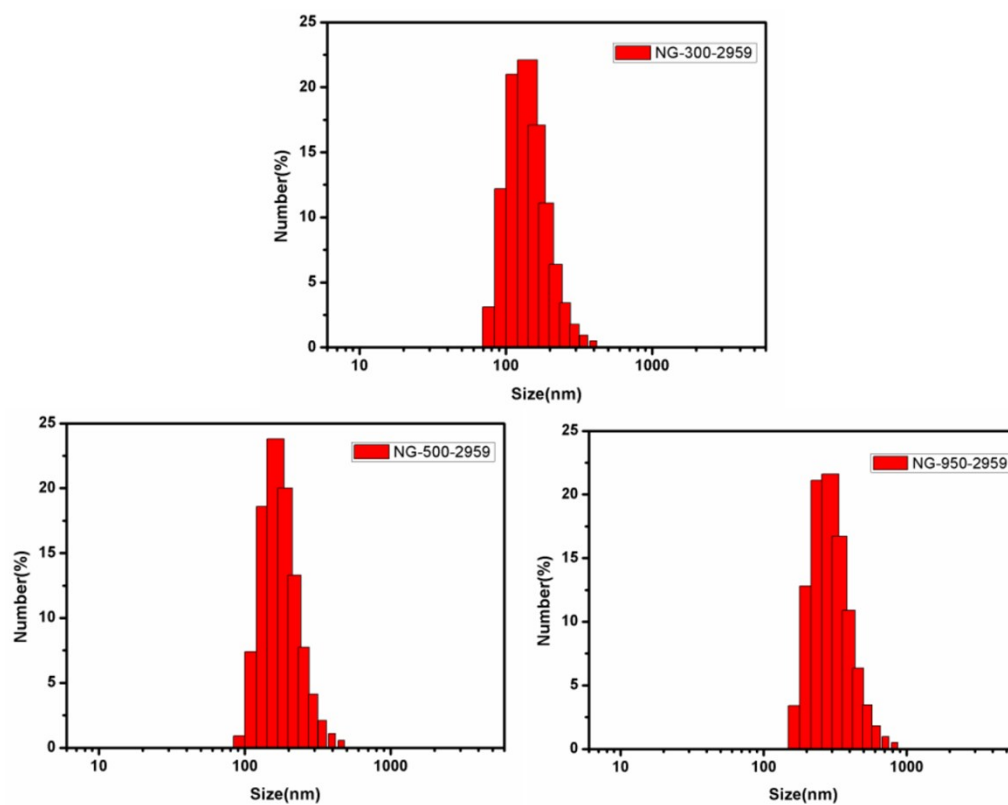

**Figure S10.** DLS histograms of nanogels in deionized water

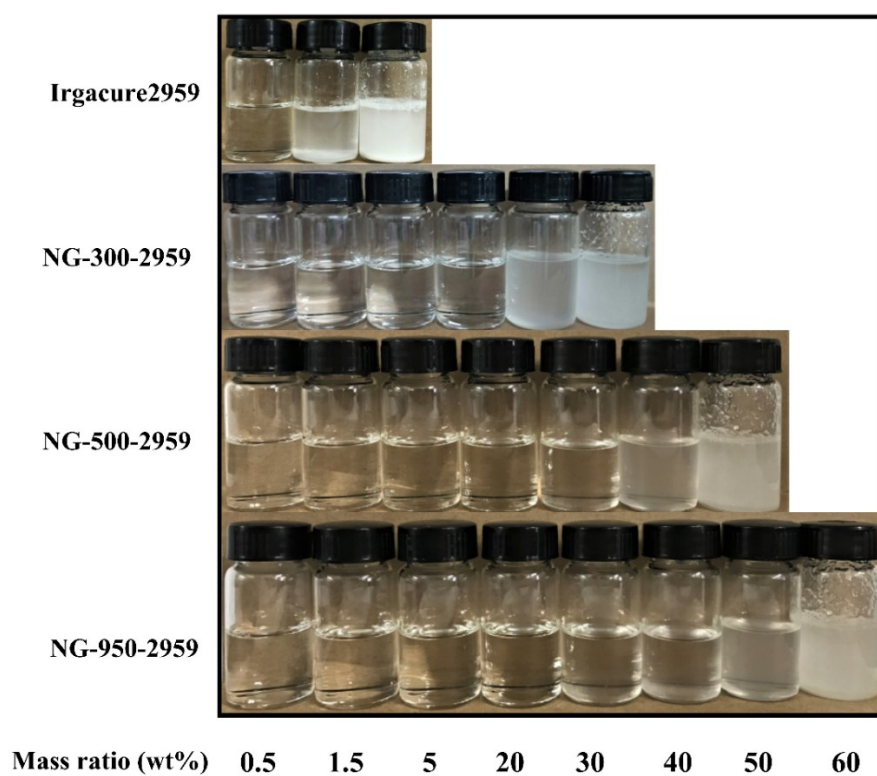

Figure S11. The images of aqueous solutions

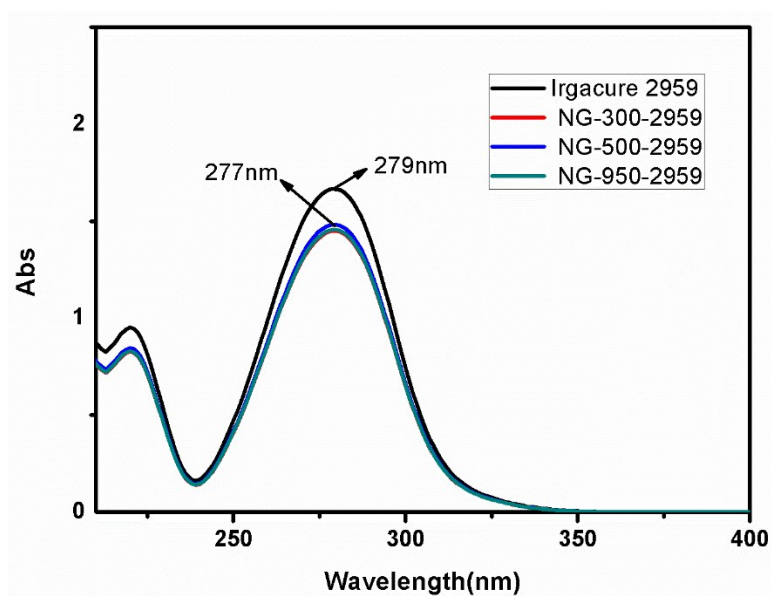

Figure S12. UV-vis absorption curves of three nanogels and Irgacure 2959 in deionized water ( $C_{2959 \text{ group}} = 1 \times 10^{-4} \text{ mol L}^{-1}$ )

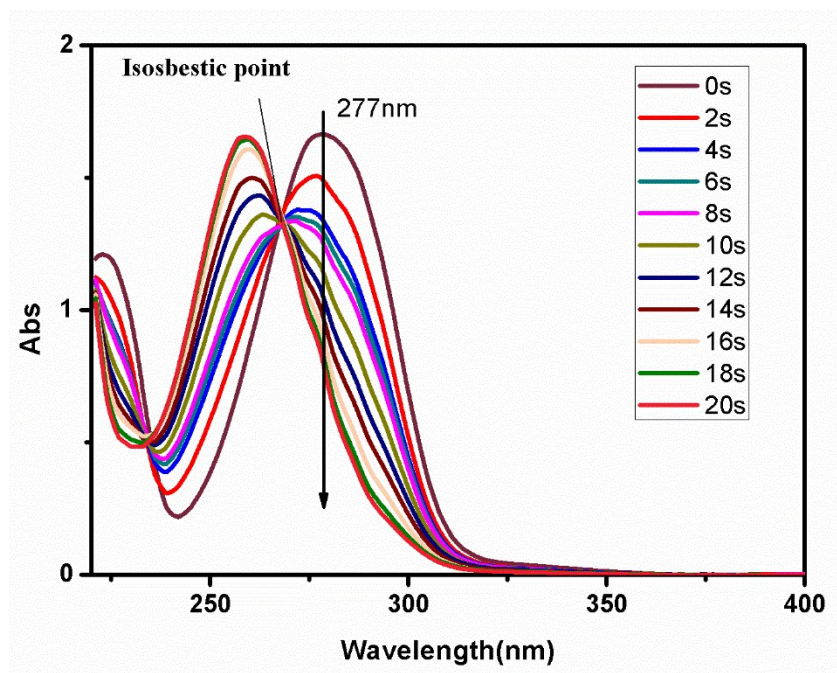

**Figure S13.** UV-vis degradation curves of NG-950-2959 in deionized water ( $C_{2959 \text{ group}} = 1 \times 10^{-4} \text{ mol L}^{-1}$ )

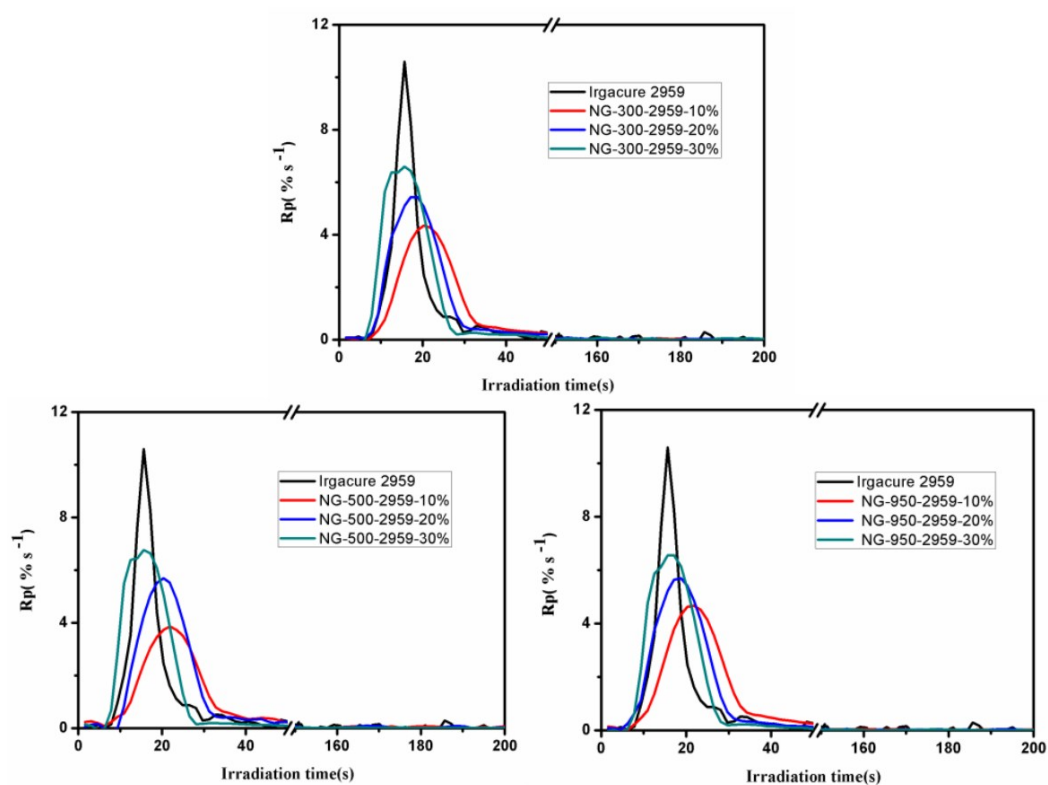

**Figure S14.** Polymerization rate profiles of PEGDMA initiated by the nanogels at various loading levels

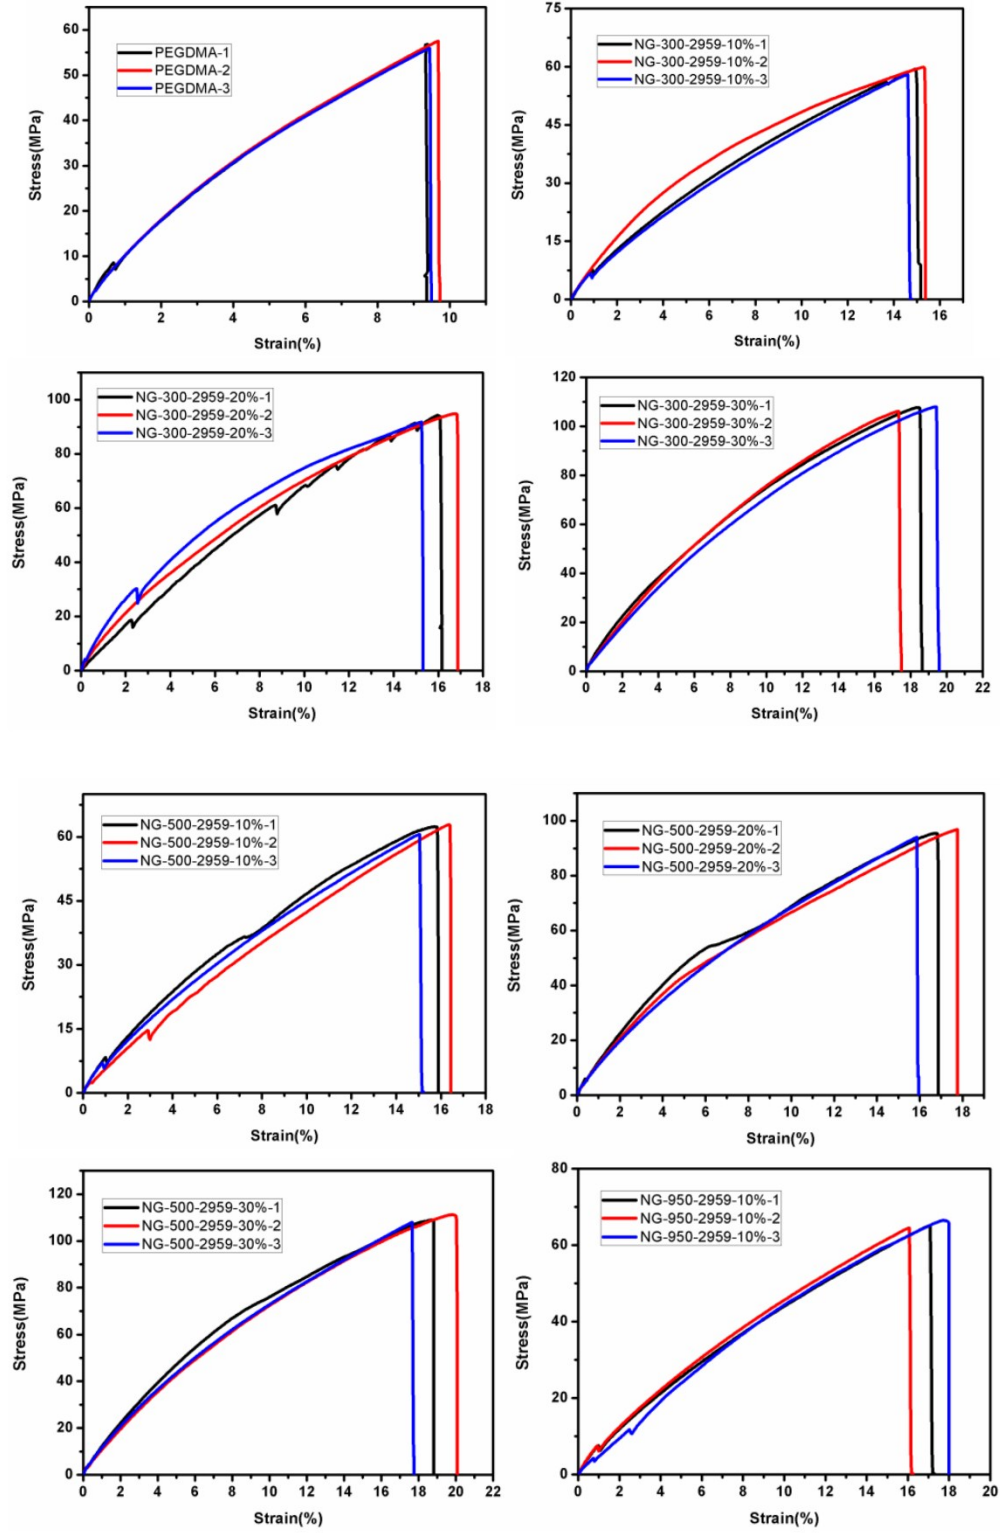

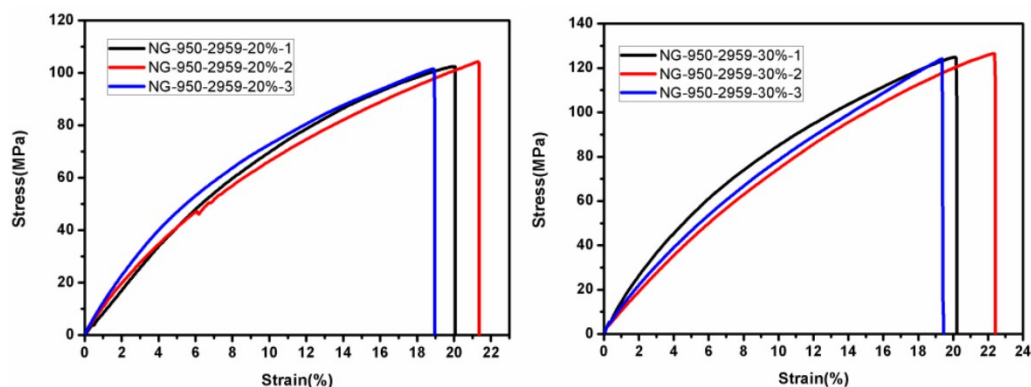

**Figure S15.** Stress–strain curves of cured films with different contents of nanogels

**Table S1.** Thermal decomposition parameters of cured films with different contents of nanogels

| Photocured films | $T_{5\%}$ ( $^{\circ}\text{C}$ ) | $T_{\text{max}1}$ ( $^{\circ}\text{C}$ ) | $T_{\text{max}2}$ ( $^{\circ}\text{C}$ ) |
|------------------|----------------------------------|------------------------------------------|------------------------------------------|
| PEGDMA           | 262                              | 327                                      | 420                                      |
| NG-300-2959-10%  | 280                              | 345                                      | 413                                      |
| NG-300-2959-20%  | 276                              | 342                                      | 406                                      |
| NG-300-2959-30%  | 262                              | 332                                      | 403                                      |
| NG-500-2959-10%  | 272                              | 343                                      | 418                                      |
| NG-500-2959-20%  | 262                              | 345                                      | 414                                      |
| NG-500-2959-30%  | 269                              | 343                                      | 412                                      |
| NG-950-2959-10%  | 276                              | 345                                      | 417                                      |
| NG-950-2959-20%  | 276                              | 346                                      | 414                                      |
| NG-950-2959-30%  | 267                              | 334                                      | 414                                      |

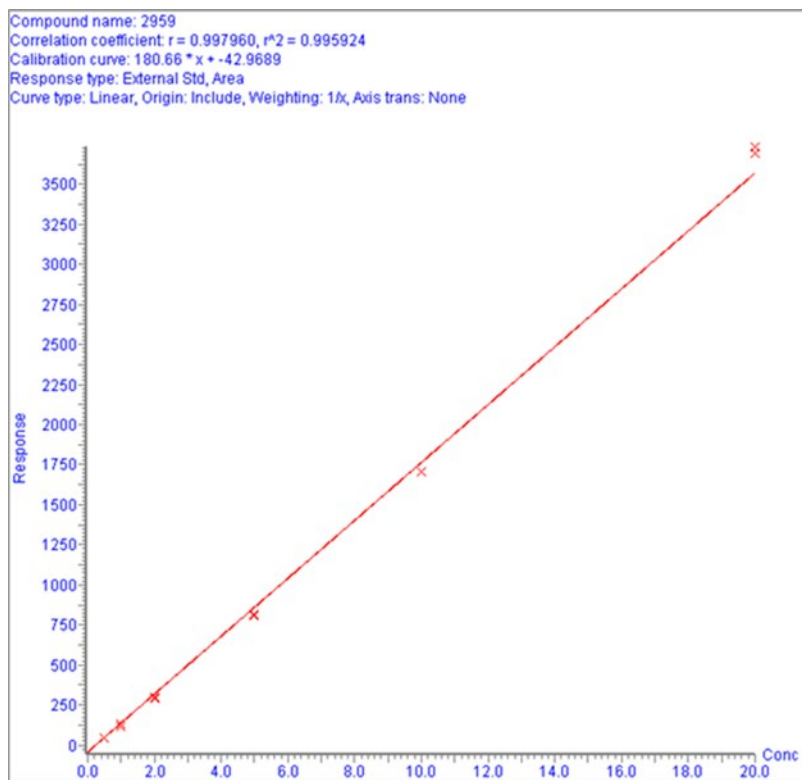

Figure S16. Standard curve of Irgacure 2959

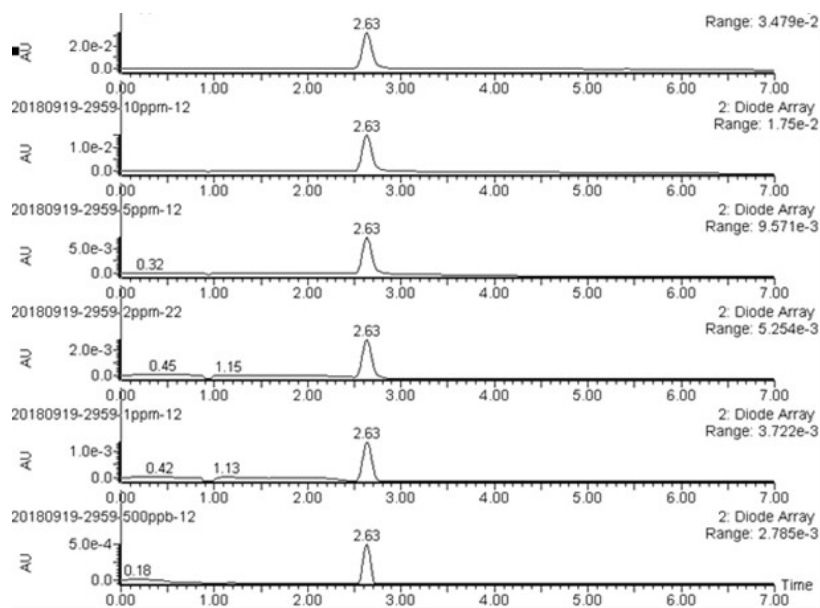

Figure S17. Chromatogram of Irgacure 2959

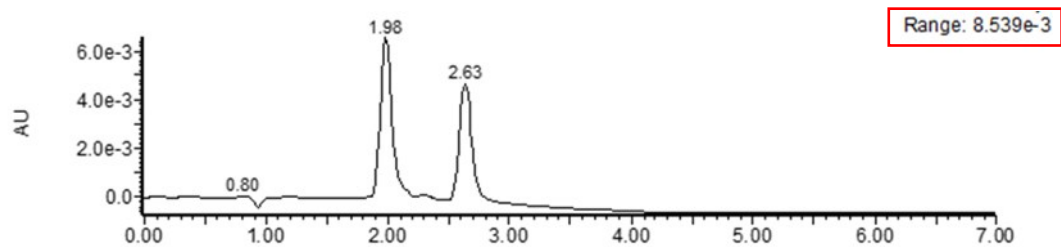

**Figure S18.** Chromatogram of the extraction solution of the cured film initiated by Irgacure 2959

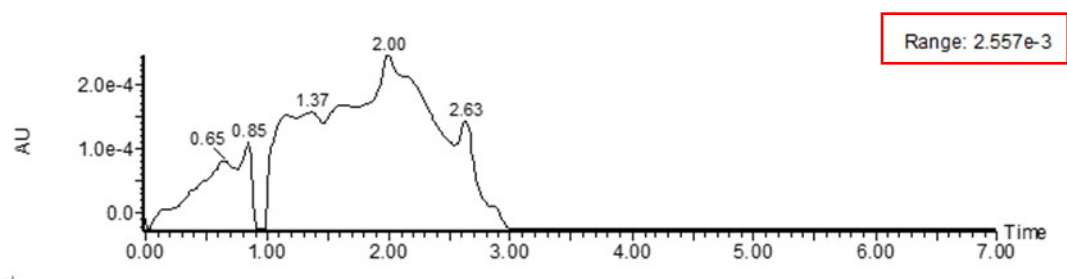

**Figure S19.** Chromatogram of the extraction solution of the cured film initiated by NG-950- 2959

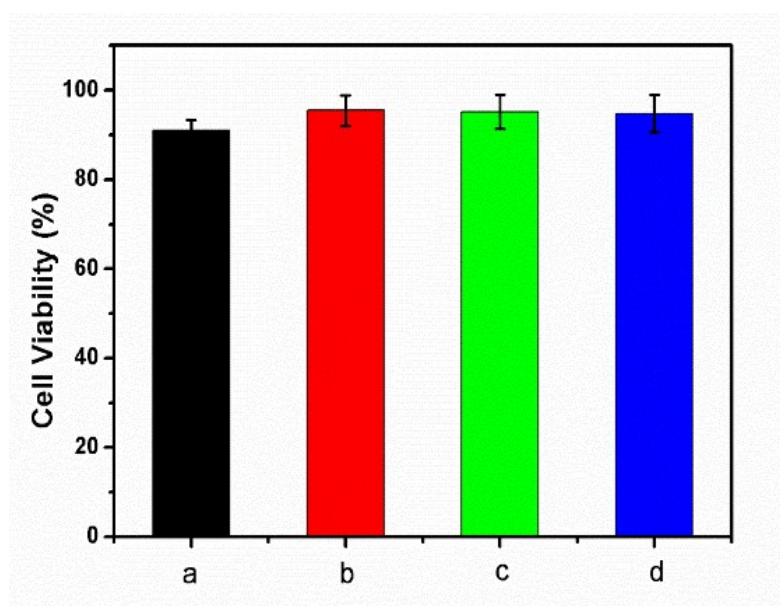

**Figure S20.** Viability of cured films with NG-950-2959 at different content incubated with Hela cells for 24h. a) Irgacure 2959 with the photosensitive group content equaling to that of nanogel at 10 wt% content. b) nanogel at 10 wt% content. c) nanogel at 20 wt% content. d) nanogel at 30 wt% content.
